# Supplementary material for: Cellular origin of the viral capsid-like bacterial microcompartments
Source: PubMed Central journal article supplement (PMC5683377; doi:10.1186/s13062-017-0197-y), 2017-11-13
Supplement: 13062_2017_197_MOESM1_ESM.pdf [file 13062_2017_197_MOESM1_ESM.pdf]

A. Top-30 results of the DALI search seeded with BMP-H protein (PDB id: 2a10)

| No: | Chain  | Z    | rmsd | lali | nres | %id | Description                                       |
|-----|--------|------|------|------|------|-----|---------------------------------------------------|
| 1:  | 2g13-A | 24.1 | 0.0  | 95   | 95   | 100 | MAJOR CARBOXYSOME SHELL PROTEIN 1A;               |
| 2:  | 5d6v-A | 18.7 | 0.7  | 89   | 90   | 57  | CARBOXYSOME SHELL PROTEIN;                        |
| 3:  | 4axj-B | 17.7 | 0.8  | 86   | 89   | 67  | ETHANOLAMINE CARBOXYSOME STRUCTURAL PROTEIN;      |
| 4:  | 4qiv-A | 17.7 | 0.8  | 86   | 86   | 51  | BACTERIAL MICROCOMPARTMENTS FAMILY PROTEIN;       |
| 5:  | 5l38-A | 17.5 | 1.4  | 90   | 91   | 50  | MSM0272 - RMM MICROCOMPARTMENT SHELL PROTEIN;     |
| 6:  | 4liw-A | 16.9 | 1.2  | 90   | 92   | 48  | CARBON DIOXIDE-CONCENTRATING MECHANISM PROTEIN CC |
| 7:  | 5djb-A | 16.7 | 0.9  | 87   | 98   | 55  | MICROCOMPARTMENTS PROTEIN;                        |
| 8:  | 2a1b-A | 16.2 | 1.4  | 91   | 101  | 52  | CARBON DIOXIDE CONCENTRATING MECHANISM PROTEIN CC |
| 9:  | 3mpw-A | 16.2 | 1.1  | 88   | 99   | 53  | ETHANOLAMINE UTILIZATION PROTEIN EUTM;            |
| 10: | 3sss-E | 15.8 | 1.2  | 89   | 106  | 49  | CARBON DIOXIDE CONCENTRATING MECHANISM PROTEIN;   |
| 11: | 4ox6-A | 15.8 | 1.2  | 89   | 103  | 35  | CARBON DIOXIDE CONCENTRATING MECHANISM PROTEIN CC |
| 12: | 4rbv-B | 15.6 | 2.7  | 91   | 94   | 57  | PROPANEDIOL UTILIZATION PROTEIN PDUA;             |
| 13: | 2a10-C | 15.2 | 1.2  | 89   | 107  | 36  | CARBON DIOXIDE CONCENTRATING MECHANISM PROTEIN CC |
| 14: | 3vcd-A | 14.7 | 1.8  | 90   | 184  | 29  | PROPANEDIOL UTILIZATION POLYHEDRAL BODY PROTEIN P |
| 15: | 3pac-A | 14.7 | 1.8  | 90   | 183  | 30  | SHELL PROTEIN;                                    |
| 16: | 3nwg-A | 13.3 | 2.1  | 83   | 180  | 31  | MICROCOMPARTMENTS PROTEIN;                        |
| 17: | 5dih-B | 11.7 | 1.5  | 88   | 202  | 23  | MICROCOMPARTMENTS PROTEIN;                        |
| 18: | 5hpn-A | 10.3 | 1.6  | 68   | 87   | 57  | PERMUTED PDUA;                                    |
| 19: | 3i82-A | 8.3  | 1.6  | 65   | 216  | 23  | ETHANOLAMINE UTILIZATION PROTEIN EUTL;            |
| 20: | 1hwu-B | 7.8  | 2.6  | 75   | 101  | 16  | PII PROTEIN;                                      |
| 21: | 2pfd-A | 7.8  | 2.8  | 86   | 540  | 9   | FORMIMIDOYLTRANSFERASE-CYCLODEAMINASE;            |
| 22: | 3dfe-B | 7.7  | 2.8  | 77   | 83   | 14  | PUTATIVE PII-LIKE SIGNALING PROTEIN;              |
| 23: | 31f0-B | 7.7  | 3.3  | 79   | 112  | 13  | NITROGEN REGULATORY PROTEIN P-II;                 |
| 24: | 3u27-D | 7.5  | 1.7  | 69   | 218  | 22  | MICROCOMPARTMENTS PROTEIN;                        |
| 25: | 3io0-A | 7.5  | 2.2  | 73   | 229  | 14  | ETUB PROTEIN;                                     |
| 26: | 4edi-C | 7.3  | 1.7  | 69   | 225  | 29  | ETHANOLAMINE UTILIZATION PROTEIN;                 |
| 27: | 4i61-A | 7.3  | 1.6  | 66   | 228  | 23  | PROPANEDIOL UTILIZATION PROTEIN PDUB;             |
| 28: | 2j9e-B | 7.3  | 3.3  | 77   | 119  | 12  | HYPOTHETICAL NITROGEN REGULATORY PII-LIKE         |
| 29: | 3ta1-D | 7.2  | 3.3  | 77   | 115  | 17  | NITROGEN REGULATORY PROTEIN P-II (GLNB-3);        |
| 30: | 2xbp-A | 7.2  | 3.3  | 77   | 113  | 14  | NITROGEN REGULATORY PROTEIN P-II;                 |

Hits to BMC-H homologs are shown in Bold; hits to PII-like proteins are in red, whereas the false-positive hit to formimidoyltransferase-cyclodeaminase is shown in plain font. The false-positive hit was evaluated by direct comparison of the protein structures.

## B. Top-30 results of the DALI search seeded with BMP-P protein (PDB id: 2rcf)

| No: | Chain  | Z    | rmsd | lali | nres | %id | Description                                       |
|-----|--------|------|------|------|------|-----|---------------------------------------------------|
| 1:  | 2rcf-A | 20.0 | 0.0  | 82   | 82   | 100 | UNIDENTIFIED CARBOXYSOME POLYPEPTIDE;             |
| 2:  | 2hd3-B | 13.1 | 2.3  | 82   | 97   | 39  | ETHANOLAMINE UTILIZATION PROTEIN EUTN;            |
| 3:  | 4i7a-D | 12.4 | 2.4  | 78   | 87   | 32  | ETHANOLAMINE UTILIZATION PROTEIN EUTN/CARBOXYSOME |
| 4:  | 5l37-C | 12.3 | 2.3  | 81   | 86   | 30  | MSM0273;                                          |
| 5:  | 4jvz-C | 11.9 | 2.3  | 81   | 97   | 31  | CARBON DIOXIDE CONCENTRATING MECHANISM PROTEIN;   |
| 6:  | 4n8x-1 | 11.8 | 2.2  | 81   | 99   | 32  | CARBON DIOXIDE CONCENTRATING MECHANISM PROTEIN;   |
| 7:  | 4jw0-B | 11.8 | 2.3  | 81   | 97   | 36  | CARBON DIOXIDE CONCENTRATING MECHANISM PROTEIN;   |
| 8:  | 2qw7-H | 11.7 | 2.3  | 81   | 98   | 36  | CARBON DIOXIDE CONCENTRATING MECHANISM PROTEIN CC |
| 9:  | 4q15-A | 6.4  | 2.1  | 53   | 68   | 17  | TRANSLATION INITIATION FACTOR IF-1;               |
| 10: | 2eif-A | 6.2  | 2.7  | 54   | 133  | 15  | PROTEIN (EUKARYOTIC TRANSLATION INITIATION FACTOR |
| 11: | 2wfw-B | 6.1  | 2.6  | 57   | 125  | 16  | ARC;                                              |
| 12: | 2dgy-A | 6.1  | 3.2  | 61   | 111  | 15  | MGC11102 PROTEIN;                                 |
| 13: | 2wg5-A | 6.0  | 2.0  | 51   | 87   | 22  | GENERAL CONTROL PROTEIN GCN4, PROTEASOME-ACTIVATI |
| 14: | 3i4o-A | 6.0  | 2.1  | 53   | 68   | 17  | TRANSLATION INITIATION FACTOR IF-1;               |
| 15: | liz6-A | 5.9  | 2.8  | 55   | 136  | 15  | INITIATION FACTOR 5A;                             |
| 16: | 1fjg-Q | 5.8  | 2.7  | 56   | 104  | 14  | 30S RIBOSOMAL PROTEIN S17;                        |
| 17: | 2ot2-A | 5.8  | 1.6  | 51   | 90   | 16  | HYDROGENASE ISOENZYMES FORMATION PROTEIN HYPC;    |
| 18: | 2n8n-A | 5.8  | 2.3  | 52   | 72   | 21  | TRANSLATION INITIATION FACTOR IF-1;               |
| 19: | 5mp9-J | 5.8  | 2.0  | 52   | 386  | 10  | PROTEASOME SUBUNIT ALPHA TYPE-1;                  |
| 20: | 1u0l-A | 5.7  | 3.3  | 57   | 278  | 14  | PROBABLE GTPASE ENG C;                            |
| 21: | 3m9b-A | 5.6  | 2.6  | 56   | 186  | 18  | PROTEASOME-ASSOCIATED ATPASE;                     |
| 22: | 3iz6-P | 5.6  | 3.9  | 65   | 85   | 2   | 40S RIBOSOMAL PROTEIN RACK1 (RACK1);              |
| 23: | 3h43-I | 5.6  | 2.1  | 54   | 79   | 17  | PROTEASOME-ACTIVATING NUCLEOTIDASE;               |
| 24: | 5mp9-I | 5.6  | 3.0  | 55   | 385  | 18  | PROTEASOME SUBUNIT ALPHA TYPE-1;                  |
| 25: | 5kzf-H | 5.5  | 2.6  | 55   | 478  | 18  | PROTEASOME-ASSOCIATED ATPASE;                     |
| 26: | 4bpe-0 | 5.5  | 2.4  | 56   | 99   | 23  | TRANSLATION INITIATION FACTOR EIF-1A FAMILY PROTE |
| 27: | 5mmj-q | 5.4  | 3.1  | 60   | 86   | 13  | 50S RIBOSOMAL PROTEIN L31;                        |
| 28: | 2z1c-B | 5.4  | 1.8  | 51   | 74   | 22  | HYDROGENASE EXPRESSION/FORMATION PROTEIN HYPC;    |
| 29: | 1bkb-A | 5.3  | 2.7  | 53   | 136  | 11  | TRANSLATION INITIATION FACTOR 5A;                 |
| 30: | 2z6b-A | 5.3  | 3.7  | 62   | 573  | 10  | TAIL-ASSOCIATED LYSOZYME;                         |

Hits to BMC-P homologs are shown in Bold; hits to OB-fold proteins are in red, whereas the two false-positives are shown in plain font. The false-positives were evaluated by direct comparison of the protein structures. In both cases, the proteins have highly enriched in beta-strands, but do not share the same fold as BMC-P.

### C. Top-30 results of the HHpred search seeded with BMP-P protein sequence (WP\_012823797)

Query WP\_012823797.1 carboxysome peptide A [Halothiobacillus neapolitanus]  
 Match\_columns 83  
 Searched\_HMMs 94372  
 Date Wed Nov 1 08:13:30 2017

| No Hit                            | Prob  | E-value | P-value | Score | SS   | Cols | Query HMM | Template HMM |
|-----------------------------------|-------|---------|---------|-------|------|------|-----------|--------------|
| 1 2RCF_A Crystal Structure of Or  | 100.0 | 4E-35   | 4.3E-40 | 190.9 | 12.7 | 83   | 1-83      | 1-83 (91)    |
| 2 2RCF_D Crystal Structure of Or  | 100.0 | 4E-35   | 4.3E-40 | 190.9 | 12.7 | 83   | 1-83      | 1-83 (91)    |
| 3 d2rcfe_b.40.15.1 (E:) Carboxy   | 100.0 | 6E-35   | 6.3E-40 | 186.0 | 12.5 | 80   | 1-80      | 1-80 (80)    |
| 4 d4jvzb_b.40.15.1 (B:) Carbon    | 100.0 | 1E-34   | 1.1E-39 | 189.7 | 12.4 | 83   | 1-83      | 1-88 (94)    |
| 5 d2qw7c_b.40.15.1 (C:) Carbon    | 100.0 | 1.1E-34 | 1.2E-39 | 189.9 | 12.3 | 83   | 1-83      | 1-88 (95)    |
| 6 4I7A_E Ethanolamine utilizatio  | 100.0 | 1.1E-34 | 1.2E-39 | 190.0 | 12.3 | 83   | 1-83      | 1-88 (95)    |
| 7 5L37_C MSM0273; bacterial micr  | 100.0 | 1.5E-34 | 1.6E-39 | 189.5 | 12.6 | 83   | 1-83      | 1-83 (95)    |
| 8 5L37_B MSM0273; bacterial micr  | 100.0 | 1.5E-34 | 1.6E-39 | 189.5 | 12.6 | 83   | 1-83      | 1-83 (95)    |
| 9 d2hd3a1_b.40.15.1 (A:1-95) Eth  | 100.0 | 1.9E-34 | 2E-39   | 188.7 | 12.3 | 83   | 1-83      | 1-88 (95)    |
| 10 5V74_P1 Ethanolamine utilizati | 100.0 | 1.7E-34 | 1.8E-39 | 189.4 | 12.0 | 83   | 1-83      | 1-88 (96)    |
| 11 d4jw0a_b.40.15.1 (A:) automat  | 100.0 | 2E-34   | 2.1E-39 | 188.6 | 12.2 | 83   | 1-83      | 1-88 (95)    |
| 12 4JVZ_C Carbon dioxide concentr | 100.0 | 2.5E-34 | 2.6E-39 | 189.4 | 12.5 | 83   | 1-83      | 1-88 (99)    |
| 13 4JW0_E Carbon dioxide concentr | 100.0 | 4.1E-34 | 4.3E-39 | 191.1 | 12.2 | 83   | 1-83      | 1-88 (108)   |
| 14 2HD3_B Ethanolamine utilizatio | 100.0 | 4.3E-34 | 4.5E-39 | 189.6 | 12.1 | 83   | 1-83      | 1-88 (103)   |
| 15 2HD3_C Ethanolamine utilizatio | 100.0 | 4.3E-34 | 4.5E-39 | 189.6 | 12.1 | 83   | 1-83      | 1-88 (103)   |
| 16 4N8F_B Carbon dioxide concentr | 100.0 | 5.3E-34 | 5.6E-39 | 191.6 | 12.5 | 83   | 1-83      | 1-88 (112)   |
| 17 2QW7_F Carbon dioxide concentr | 100.0 | 4.8E-34 | 5.1E-39 | 191.6 | 12.3 | 83   | 1-83      | 1-88 (111)   |
| 18 2QW7_H Carbon dioxide concentr | 100.0 | 4.8E-34 | 5.1E-39 | 191.6 | 12.3 | 83   | 1-83      | 1-88 (111)   |
| 19 d4n8x2_b.40.15.1 (2:) Carbon   | 100.0 | 7.8E-34 | 8.2E-39 | 186.1 | 12.1 | 83   | 1-83      | 1-89 (96)    |
| 20 4N8X_B Carbon dioxide concentr | 100.0 | 1.9E-33 | 2E-38   | 188.1 | 12.1 | 83   | 1-83      | 1-89 (109)   |
| 21 4N8X_4 Carbon dioxide concentr | 100.0 | 1.9E-33 | 2E-38   | 188.1 | 12.1 | 83   | 1-83      | 1-89 (109)   |
| 22 PF03319.12 ; EutN_CcmL ; Ethan | 100.0 | 6.3E-33 | 6.7E-38 | 179.7 | 11.9 | 78   | 1-78      | 1-89 (89)    |
| 23 d3vyta_b.40.14.1 (A:) Hydroge  | 76.7  | 9.6     | 0.0001  | 22.8  | 2.9  | 25   | 31-55     | 20-45 (52)   |
| 24 d1b70b3_b.40.4.4 (B:39-151) Do | 76.6  | 40      | 0.00042 | 22.9  | 7.1  | 48   | 6-56      | 8-56 (113)   |
| 25 2XVS_A TETRATRICOPEPTIDE REPEA | 74.4  | 39      | 0.00041 | 24.9  | 5.9  | 46   | 6-54      | 79-130 (166) |
| 26 PF16669.4 ; TTC5_OB ; Tetratri | 74.2  | 50      | 0.00053 | 22.8  | 6.2  | 44   | 6-52      | 20-69 (114)  |
| 27 2Z1C_B Hydrogenase expression/ | 72.2  | 10      | 0.00011 | 24.5  | 2.4  | 21   | 37-57     | 28-49 (75)   |
| 28 d2z1ca1_b.40.14.1 (A:2-72) Hyd | 69.0  | 18      | 0.00019 | 23.1  | 2.9  | 19   | 37-55     | 27-46 (71)   |
| 29 PF01455.17 ; HupF_HypC ; HupF/ | 68.8  | 48      | 0.00051 | 20.9  | 4.6  | 40   | 15-55     | 8-48 (66)    |
| 30 3PCO_B Phenylalanyl-tRNA synth | 66.8  | 77      | 0.00081 | 28.4  | 6.9  | 51   | 6-56      | 46-97 (795)  |

Hits to BMC-P homologs are shown in Bold; hits to OB-fold proteins are in red.
